# Supplementary material
Source: MDPI journal article supplement (https://www.mdpi.com/2075-163X/9/9/508)
Supplement: s1 [file s1]

## Sheet: DH
Supplemental File S-1. U-Pb zircon geochronology of silicocarbonate pegmatite samples.
Age and Origin of Silicocarbonate Pegmatites of the Adirondack Region
Authors - Chiarenzelli, Lupulescu, Robinson, Bailey, Singer
Dana Hill	N44.369o	W75.187o
							Isotope ratios						Apparent ages (Ma)
Analysis	U	206Pb	U/Th	206Pb*	±	207Pb*	±	206Pb*	±	error	206Pb*	±	207Pb*	±	206Pb*	±	Best age	±	Conc	Analyses
	(ppm)	204Pb		207Pb*	(%)	235U*	(%)	238U	(%)	corr.	238U*	(Ma)	235U	(Ma)	207Pb*	(Ma)	(Ma)	(Ma)	(%)	(n)
All data
DHP-5 <>	2391.47	28037.2	9.88875	16.3103	0.954073	0.369195	9.65665	0.0436734	9.60941	0.995107	275.563	25.9221	319.057	26.4451	650.154	20.4847	275.563	25.9221	NA	1
DHP-6 <>	1489.56	45754.7	16.0338	16.1505	0.633717	0.652206	2.9993	0.0763956	2.93158	0.977424	474.572	13.4127	509.835	12.0224	671.248	13.5741	474.572	13.4127	70.7	2
DHP-9 <>	1188.84	40537.6	15.9416	15.1861	0.507143	0.840274	4.75895	0.0925476	4.73185	0.994306	570.587	25.8391	619.297	22.0672	801.583	10.6428	570.587	25.8391	71.1825	3
DHP-18 <>	1266.3	24273.1	14.0864	14.509	1.02236	0.90524	6.29487	0.0952574	6.21129	0.986723	586.556	34.8247	654.524	30.378	896.42	21.1123	586.556	34.8247	65.4331	4
DHP-19 <>	1180.77	56946.4	16.4949	14.944	0.692225	0.884281	3.87023	0.095842	3.80782	0.983875	589.995	21.4686	643.292	18.4442	835.156	14.423	589.995	21.4686	70.6449	5
DHP-14 <>	1271.58	39103.9	17.5091	13.8356	0.760676	1.04163	8.48528	0.104523	8.45112	0.995974	640.86	51.5559	724.729	43.985	993.737	15.4542	640.86	51.5559	64.4899	6
DHP-12 <>	1323.69	59691.6	19.3443	14.4753	0.58211	1.09024	6.77198	0.114458	6.74692	0.996299	698.587	44.6698	748.619	35.88	901.208	11.9948	698.587	44.6698	77.5168	7
DHP-2 <>	1067.31	2226.66	15.1664	13.899	1.98712	1.20294	7.94481	0.121262	7.69229	0.968216	737.825	53.6294	801.941	44.0785	984.468	40.4352	737.825	53.6294	74.9466	8
DHP-10 <>	1005.72	33328.2	13.2927	13.6225	0.960904	1.27421	6.34851	0.125891	6.27537	0.988479	764.384	45.2339	834.272	36.1323	1025.22	19.44	764.384	45.2339	74.5581	9
DHP-17 <>	959.206	142498	16.7377	13.891	0.679556	1.35068	2.88641	0.136077	2.80527	0.971891	822.439	21.6606	867.853	16.8417	985.631	13.8313	985.631	13.8313	83.4429	10
DHP-16 <>	939.456	9005.59	15.5375	13.6182	0.96571	1.30797	2.87485	0.129186	2.7078	0.941892	783.222	19.9704	849.236	16.5444	1025.86	19.5549	1025.86	19.5549	76.3478	11
DHP-8 <>	876.421	188261	9.20527	13.5995	0.284443	1.61389	2.41026	0.159182	2.39342	0.993012	952.228	21.1875	975.619	15.1117	1028.64	5.75211	1028.64	5.75211	92.5713	12
DHP-13 <>	928.061	251727	9.79987	13.5848	0.54111	1.6994	1.0284	0.167435	0.874538	0.850383	997.965	8.08558	1008.3	6.57398	1030.82	10.9372	1030.82	10.9372	96.8128	13
DHP-4 <>	885.773	434524	10.1078	13.5675	0.531482	1.64385	1.18615	0.161757	1.06042	0.893997	966.533	9.51794	987.193	7.48866	1033.39	10.739	1033.39	10.739	93.5302	14
DHP-7 <>	865.714	52472.4	9.52193	13.5541	0.304967	1.65674	2.30225	0.162863	2.28196	0.991188	972.67	20.6026	992.129	14.5786	1035.39	6.16012	1035.39	6.16012	93.9424	15
DHP-11 <>	822.992	110374	8.7499	13.5475	0.517299	1.65312	1.53938	0.162429	1.44986	0.941846	970.259	13.0599	990.748	9.73949	1036.38	10.467	1036.38	10.467	93.6199	16
DHP-3 <>	961.22	37825.3	9.38059	13.5408	0.437274	1.57012	6.85211	0.154196	6.83814	0.997962	924.443	58.8928	958.472	42.5292	1037.38	8.84919	1037.38	8.84919	89.1133	17
DHP-1 <>	879.21	261810	9.51017	13.513	0.288597	1.78221	0.890562	0.174666	0.842503	0.946036	1037.77	8.07578	1038.99	5.79253	1041.53	5.84322	1041.53	5.84322	99.6387	18
	1127.96		13.1283													UI	1051±28 Ma
	368.443		3.55504
Data >90 concordant
DHP-8 <>	876.421	188261	9.20527	13.5995	0.284443	1.61389	2.41026	0.159182	2.39342	0.993012	952.228	21.1875	975.619	15.1117	1028.64	5.75211	1028.64	5.75211	92.5713	1
DHP-13 <>	928.061	251727	9.79987	13.5848	0.54111	1.6994	1.0284	0.167435	0.874538	0.850383	997.965	8.08558	1008.3	6.57398	1030.82	10.9372	1030.82	10.9372	96.8128	2
DHP-4 <>	885.773	434524	10.1078	13.5675	0.531482	1.64385	1.18615	0.161757	1.06042	0.893997	966.533	9.51794	987.193	7.48866	1033.39	10.739	1033.39	10.739	93.5302	3
DHP-7 <>	865.714	52472.4	9.52193	13.5541	0.304967	1.65674	2.30225	0.162863	2.28196	0.991188	972.67	20.6026	992.129	14.5786	1035.39	6.16012	1035.39	6.16012	93.9424	4
DHP-11 <>	822.992	110374	8.7499	13.5475	0.517299	1.65312	1.53938	0.162429	1.44986	0.941846	970.259	13.0599	990.748	9.73949	1036.38	10.467	1036.38	10.467	93.6199	5
DHP-1 <>	879.21	261810	9.51017	13.513	0.288597	1.78221	0.890562	0.174666	0.842503	0.946036	1037.77	8.07578	1038.99	5.79253	1041.53	5.84322	1041.53	5.84322	99.6387	6
	876.362		9.48249													WA	1034.8±5.9
	155.377		1.89498
Single concordant point
DHP-1 <>	879.21	261810	9.51017	13.513	0.288597	1.78221	0.890562	0.174666	0.842503	0.946036	1037.77	8.07578	1038.99	5.79253	1041.53	5.84322	1041.53	5.84322	99.6387	1
	879		9.5													CA	1040.1±5.0 Ma

## Sheet: ED
Supplemental File S-1. U-Pb zircon geochronology of silicocarbonate pegmatite samples.
Age and Origin of Silicocarbonate Pegmatites of the Adirondack Region
Authors - Chiarenzelli, Lupulescu, Robinson, Bailey, Singer
Edwards	N44.316o	W75.240o
							Isotope ratios						Apparent ages (Ma)
Analysis	U	206Pb	U/Th	206Pb*	±	207Pb*	±	206Pb*	±	error	206Pb*	±	207Pb*	±	206Pb*	±	Best age	±	Conc	Analyses
	(ppm)	204Pb		207Pb*	(%)	235U*	(%)	238U	(%)	corr.	238U*	(Ma)	235U	(Ma)	207Pb*	(Ma)	(Ma)	(Ma)	(%)	n
All data
ED-14 <>	934.179	124662	15.2632	13.5617	0.233983	1.6674	2.51986	0.164003	2.50898	0.99568	978.986	22.7885	996.198	15.9954	1034.26	4.72757	1034.26	4.72757	94.6553	1
ED-16 <>	498.301	333472	33.7061	13.4806	0.333118	1.81956	1.40824	0.177899	1.36827	0.97162	1055.48	13.3216	1052.53	9.22791	1046.41	6.73643	1046.41	6.73643	100.867	2
ED-19 <>	336.231	197496	41.0764	13.4571	0.643594	1.83949	1.09169	0.179534	0.8818	0.807739	1064.43	8.65215	1059.68	7.18113	1049.93	12.991	1049.93	12.991	101.381	3
ED-15 <>	728.086	115494	23.0688	13.4014	0.287789	1.81225	1.77249	0.176144	1.74897	0.986731	1045.88	16.8853	1049.89	11.5984	1058.28	5.79282	1058.28	5.79282	98.8281	4
ED-20 <>	212.773	162651	36.0378	13.3421	0.584818	1.84903	3.35188	0.178924	3.30047	0.984662	1061.09	32.2909	1063.09	22.092	1067.19	11.7438	1067.19	11.7438	99.4286	5
ED-9L <>	758.59	168822	12.3586	13.1892	0.58428	1.76578	2.85733	0.168909	2.79695	0.97887	1006.1	26.0542	1032.97	18.5249	1090.29	11.7056	1090.29	11.7056	92.2778	6
ED-13 <>	36.3199	3730.88	0.416096	13.0592	3.51701	1.94136	4.56321	0.183874	2.90749	0.637158	1088.11	29.1108	1095.47	30.5907	1110.11	70.2916	1110.11	70.2916	98.018	7
ED-12 <>	81.666	5259.27	0.552896	12.5583	1.61553	2.08251	2.57802	0.189677	2.00905	0.779299	1119.63	20.6489	1143.06	17.6866	1187.83	31.9183	1187.83	31.9183	94.2581	8
ED-24 <>	68.9708	5592.14	0.656081	12.5523	2.23348	2.09827	3.59423	0.191023	2.81603	0.783488	1126.91	29.1154	1148.24	24.7208	1188.76	44.107	1188.76	44.107	94.7972	9
ED-27 <>	675.897	164654	1.13021	12.1316	0.724602	2.03985	4.16022	0.17948	4.09663	0.984715	1064.13	40.1861	1128.91	28.3534	1255.75	14.1859	1255.75	14.1859	84.7406	10
ED-8 <>	327.415	148270	1.54756	11.8432	0.735421	2.61453	2.70358	0.224575	2.60163	0.962292	1306	30.757	1304.73	19.8594	1302.61	14.2863	1302.61	14.2863	100.26	11
ED-11 <>	179.374	181057	1.17017	11.7252	0.71387	2.72159	1.41855	0.231441	1.22584	0.864147	1342.05	14.8518	1334.37	10.5338	1322.05	13.8305	1322.05	13.8305	101.513	12
ED-5 <>	325.662	583064	1.305	11.638	0.42872	2.66228	2.30894	0.224714	2.26879	0.982611	1306.74	26.8356	1318.06	17.0445	1336.49	8.29031	1336.49	8.29031	97.7738	13
ED-1 <>	135.508	271265	1.2415	11.6357	0.752028	2.81357	2.15246	0.237437	2.01681	0.936981	1373.36	24.9466	1359.16	16.126	1336.87	14.5395	1336.87	14.5395	102.73	14
ED-23 <>	184.281	274985	1.49279	10.981	0.513792	3.14264	1.67352	0.250284	1.5927	0.951705	1439.94	20.5531	1443.2	12.8914	1447.98	9.78274	1447.98	9.78274	99.4449	15
ED-6 <>	207.661	183189	1.43975	10.9744	0.463011	3.20529	3.2981	0.255121	3.26544	0.990097	1464.83	42.7884	1458.44	25.5304	1449.12	8.81447	1449.12	8.81447	101.084	16
ED-18 <>	144.457	132582	1.79904	10.9527	0.928088	3.20983	1.6794	0.254976	1.39966	0.833426	1464.09	18.3318	1459.53	13.0025	1452.89	17.6596	1452.89	17.6596	100.771	17
ED-4 <>	478.733	243218	1.86063	10.5989	0.345355	3.53529	3.33628	0.27176	3.31836	0.994628	1549.73	45.7119	1535.15	26.4126	1515.1	6.51524	1515.1	6.51524	102.286	18
	350.784		9.78459
	269.041		14.0102
Younger Group (ca. 1055 Ma)
ED-16 <>	498.301	333472	33.7061	13.4806	0.333118	1.81956	1.40824	0.177899	1.36827	0.97162	1055.48	13.3216	1052.53	9.22791	1046.41	6.73643	1046.41	6.73643	100.867	1
ED-19 <>	336.231	197496	41.0764	13.4571	0.643594	1.83949	1.09169	0.179534	0.8818	0.807739	1064.43	8.65215	1059.68	7.18113	1049.93	12.991	1049.93	12.991	101.381	2
ED-15 <>	728.086	115494	23.0688	13.4014	0.287789	1.81225	1.77249	0.176144	1.74897	0.986731	1045.88	16.8853	1049.89	11.5984	1058.28	5.79282	1058.28	5.79282	98.8281	3
ED-20 <>	212.773	162651	36.0378	13.3421	0.584818	1.84903	3.35188	0.178924	3.30047	0.984662	1061.09	32.2909	1063.09	22.092	1067.19	11.7438	1067.19	11.7438	99.4286	4
	443.848		33.4723													CA	1056±3.7
	222.661		7.58706													WA	1054.5±7.7
Inherited Group (ca. 1330 Ma)
ED-8 <>	327.415	148270	1.54756	11.8432	0.735421	2.61453	2.70358	0.224575	2.60163	0.962292	1306	30.757	1304.73	19.8594	1302.61	14.2863	1302.61	14.2863	100.26	1
ED-11 <>	179.374	181057	1.17017	11.7252	0.71387	2.72159	1.41855	0.231441	1.22584	0.864147	1342.05	14.8518	1334.37	10.5338	1322.05	13.8305	1322.05	13.8305	101.513	2
ED-5 <>	325.662	583064	1.305	11.638	0.42872	2.66228	2.30894	0.224714	2.26879	0.982611	1306.74	26.8356	1318.06	17.0445	1336.49	8.29031	1336.49	8.29031	97.7738	3
ED-1 <>	135.508	271265	1.2415	11.6357	0.752028	2.81357	2.15246	0.237437	2.01681	0.936981	1373.36	24.9466	1359.16	16.126	1336.87	14.5395	1336.87	14.5395	102.73	4
	241.99		1.31606													CA	1330±5.4
	99.2598		0.163865													WA	1328±23
Inherited Group (ca. 1450 Ma)
ED-23 <>	184.281	274985	1.49279	10.981	0.513792	3.14264	1.67352	0.250284	1.5927	0.951705	1439.94	20.5531	1443.2	12.8914	1447.98	9.78274	1447.98	9.78274	99.4449	1
ED-6 <>	207.661	183189	1.43975	10.9744	0.463011	3.20529	3.2981	0.255121	3.26544	0.990097	1464.83	42.7884	1458.44	25.5304	1449.12	8.81447	1449.12	8.81447	101.084	2
ED-18 <>	144.457	132582	1.79904	10.9527	0.928088	3.20983	1.6794	0.254976	1.39966	0.833426	1464.09	18.3318	1459.53	13.0025	1452.89	17.6596	1452.89	17.6596	100.771	3
	178.8		1.57719													CA	1450±5.9
	31.9564		0.193949													WA	1449±12
Inherited (ca. 1515 Ma)
ED-4 <>	478.733	243218	1.86063	10.5989	0.345355	3.53529	3.33628	0.27176	3.31836	0.994628	1549.73	45.7119	1535.15	26.4126	1515.1	6.51524	1515.1	6.51524	102.286	1
																CA	1516.1±7.1

## Sheet: FN
Supplemental File S-1. U-Pb zircon geochronology of silicocarbonate pegmatite samples.
Age and Origin of Silicocarbonate Pegmatites of the Adirondack Region
Authors - Chiarenzelli, Lupulescu, Robinson, Bailey, Singer
Fine	N44.247o	W75.135o
							Isotope ratios						Apparent ages (Ma)
Analysis	U	206Pb	U/Th	206Pb*	±	207Pb*	±	206Pb*	±	error	206Pb*	±	207Pb*	±	206Pb*	±	Best age	±	Conc	Analyses
	(ppm)	204Pb		207Pb*	(%)	235U*	(%)	238U	(%)	corr.	238U*	(Ma)	235U	(Ma)	207Pb*	(Ma)	(Ma)	(Ma)	(%)	n
All data
FINE-9 <>	750.552	93232	16.1933	13.5581	0.537603	1.74068	1.00661	0.171165	0.851021	0.845437	1018.53	8.01782	1023.72	6.49166	1034.8	10.8796	1034.8	10.8796	98.4271	1
FINE-17 <>	859.776	32343.7	14.1747	13.5436	0.509338	1.60372	3.17587	0.157529	3.13476	0.987056	943.03	27.5014	971.661	19.8647	1036.96	10.3054	1036.96	10.3054	90.9418	2
FINE-3 <>	1026.44	13684.3	13.6269	13.5334	1.0127	1.52118	3.81045	0.149309	3.67341	0.964037	897.088	30.7638	938.951	23.3485	1038.48	20.4654	1038.48	20.4654	86.3847	3
FINE-13 <>	770.359	582043	14.2753	13.4672	0.346225	1.80378	2.56626	0.176181	2.5428	0.990857	1046.08	24.5537	1046.83	16.7652	1048.41	6.99911	1048.41	6.99911	99.7771	4
FINE-4 <>	898.263	67018.6	14.426	13.4509	0.380717	1.7788	0.896992	0.173531	0.812188	0.905457	1031.54	7.74207	1037.74	5.83032	1050.85	7.69156	1050.85	7.69156	98.1624	5
FINE-6 <>	666.88	328081	16.0741	13.4498	0.721658	1.80918	0.784559	0.17648	0.307804	0.392327	1047.71	2.97647	1048.78	5.13052	1051.02	14.5623	1051.02	14.5623	99.6854	6
FINE-20 <>	853.296	235681	13.2105	13.4454	0.276651	1.80466	0.767612	0.175983	0.716026	0.932796	1044.99	6.90743	1047.15	5.01523	1051.67	5.57468	1051.67	5.57468	99.365	7
FINE-10 <>	983.695	263355	13.7118	13.4398	0.296676	1.80783	0.456608	0.176218	0.347094	0.760158	1046.28	3.35218	1048.29	2.98512	1052.51	5.97693	1052.51	5.97693	99.4081	8
FINE-1 <>	679.32	305471	15.4954	13.4397	0.539281	1.85691	1.03859	0.181001	0.887611	0.854627	1072.44	8.76943	1065.89	6.85452	1052.53	10.8847	1052.53	10.8847	101.892	9
FINE-5 <>	890.595	18195.7	12.8876	13.4193	0.501442	1.75302	1.70122	0.170614	1.62564	0.955573	1015.49	15.2737	1028.28	10.9998	1055.6	10.0974	1055.6	10.0974	96.2009	10
FINE-15 <>	743.19	26141.9	13.1853	13.4081	0.498709	1.75908	1.17739	0.171061	1.06655	0.905862	1017.95	10.0432	1030.51	7.62215	1057.27	10.0402	1057.27	10.0402	96.2814	11
FINE-19 <>	637.198	116656	17.3099	13.4044	0.59323	1.8412	1.34493	0.178997	1.20702	0.897464	1061.49	11.8132	1060.29	8.8499	1057.83	11.9427	1057.83	11.9427	100.346	12
FINE-18 <>	775.654	204294	13.8181	13.4043	0.517148	1.84958	0.973684	0.179811	0.824996	0.847293	1065.94	8.10539	1063.28	6.41721	1057.84	10.4109	1057.84	10.4109	100.765	13
FINE-2 <>	728.268	238124	15.1206	13.4005	0.515735	1.84961	1.29244	0.179762	1.18508	0.916933	1065.68	11.6405	1063.29	8.51812	1058.41	10.3824	1058.41	10.3824	100.686	14
FINE-16 <>	941.913	336143	15.9202	13.3912	0.347125	1.82824	1.10923	0.177563	1.05352	0.949772	1053.65	10.2407	1055.65	7.28077	1059.81	6.98595	1059.81	6.98595	99.4192	15
	813.694		14.6286													UI	1054.2±5.8
	118.834		1.31982
>97% Concordant
FINE-4 <>	898.263	67018.6	14.426	13.4509	0.380717	1.7788	0.896992	0.173531	0.812188	0.905457	1031.54	7.74207	1037.74	5.83032	1050.85	7.69156	1050.85	7.69156	98.1624	1
FINE-9 <>	750.552	93232	16.1933	13.5581	0.537603	1.74068	1.00661	0.171165	0.851021	0.845437	1018.53	8.01782	1023.72	6.49166	1034.8	10.8796	1034.8	10.8796	98.4271	2
FINE-20 <>	853.296	235681	13.2105	13.4454	0.276651	1.80466	0.767612	0.175983	0.716026	0.932796	1044.99	6.90743	1047.15	5.01523	1051.67	5.57468	1051.67	5.57468	99.365	3
FINE-10 <>	983.695	263355	13.7118	13.4398	0.296676	1.80783	0.456608	0.176218	0.347094	0.760158	1046.28	3.35218	1048.29	2.98512	1052.51	5.97693	1052.51	5.97693	99.4081	4
FINE-16 <>	941.913	336143	15.9202	13.3912	0.347125	1.82824	1.10923	0.177563	1.05352	0.949772	1053.65	10.2407	1055.65	7.28077	1059.81	6.98595	1059.81	6.98595	99.4192	5
FINE-6 <>	666.88	328081	16.0741	13.4498	0.721658	1.80918	0.784559	0.17648	0.307804	0.392327	1047.71	2.97647	1048.78	5.13052	1051.02	14.5623	1051.02	14.5623	99.6854	6
FINE-13 <>	770.359	582043	14.2753	13.4672	0.346225	1.80378	2.56626	0.176181	2.5428	0.990857	1046.08	24.5537	1046.83	16.7652	1048.41	6.99911	1048.41	6.99911	99.7771	7
FINE-19 <>	637.198	116656	17.3099	13.4044	0.59323	1.8412	1.34493	0.178997	1.20702	0.897464	1061.49	11.8132	1060.29	8.8499	1057.83	11.9427	1057.83	11.9427	100.346	8
FINE-2 <>	728.268	238124	15.1206	13.4005	0.515735	1.84961	1.29244	0.179762	1.18508	0.916933	1065.68	11.6405	1063.29	8.51812	1058.41	10.3824	1058.41	10.3824	100.686	9
FINE-18 <>	775.654	204294	13.8181	13.4043	0.517148	1.84958	0.973684	0.179811	0.824996	0.847293	1065.94	8.10539	1063.28	6.41721	1057.84	10.4109	1057.84	10.4109	100.765	10
FINE-1 <>	679.32	305471	15.4954	13.4397	0.539281	1.85691	1.03859	0.181001	0.887611	0.854627	1072.44	8.76943	1065.89	6.85452	1052.53	10.8847	1052.53	10.8847	101.892	11
	789.582		15.0505													CA	1048.8±4.6
	115.341		1.26907													WA	1052.5±4.8

## Sheet: HL
Supplemental File S-1. U-Pb zircon geochronology of silicocarbonate pegmatite samples.
Age and Origin of Silicocarbonate Pegmatites of the Adirondack Region
Authors - Chiarenzelli, Lupulescu, Robinson, Bailey, Singer
Hickory Lake	N44.465o	W75.493o
							Isotope ratios						Apparent ages (Ma)
Analysis	U	206Pb	U/Th	206Pb*	±	207Pb*	±	206Pb*	±	error	206Pb*	±	207Pb*	±	206Pb*	±	Best age	±	Conc	Analyses
	(ppm)	204Pb		207Pb*	(%)	235U*	(%)	238U	(%)	corr.	238U*	(Ma)	235U	(Ma)	207Pb*	(Ma)	(Ma)	(Ma)	(%)	n
All data
HICKORYLAKE-1 <>	2543.03	60007.1	2.66869	16.502	0.520486	0.382629	5.81768	0.0457945	5.79435	0.99599	288.65	16.3565	328.971	16.3489	624.998	11.2422	288.65	16.3565	NA	1
HICKORYLAKE-4 <>	1245.44	84153	3.56717	14.42	0.428652	0.821019	4.18259	0.0858652	4.16056	0.994735	531.037	21.2087	608.617	19.1498	909.094	8.84767	531.037	21.2087	58.4139	2
HICKORYLAKE-5 <>	279.392	186576	19.977	13.183	0.965224	1.92974	1.06721	0.184506	0.455275	0.426604	1091.55	4.57157	1091.45	7.13766	1091.24	19.3169	1091.24	19.3169	100.028	3
HICKORYLAKE-6 <>	295.282	323291	18.5158	13.132	0.474687	1.92744	0.841702	0.183573	0.695079	0.825802	1086.47	6.94972	1090.65	5.62711	1099.02	9.48975	1099.02	9.48975	98.8579	4
HICKORYLAKE-12 <>	516.103	99903.5	11.1701	13.0069	0.337351	2.01104	1.7403	0.189711	1.70729	0.981032	1119.81	17.5501	1119.24	11.8026	1118.16	6.74993	1118.16	6.74993	100.148	5
HICKORYLAKE-10 <>	672.225	659190	19.0554	12.7623	0.439589	1.98241	1.06841	0.183494	0.973787	0.911436	1086.03	9.73281	1109.54	7.2111	1155.89	8.72172	1155.89	8.72172	93.9567	6
HICKORYLAKE-3 <>	429.196	242549	8.80522	12.7027	0.521297	2.14825	0.887152	0.197916	0.717836	0.809147	1164.11	7.64536	1164.49	6.1468	1165.16	10.3477	1165.16	10.3477	99.9098	7
HICKORYLAKE-8 <>	317.947	197923	6.56467	12.7011	0.557231	2.14999	0.998019	0.19805	0.827971	0.829614	1164.84	8.82336	1165.05	6.91676	1165.42	11.0599	1165.42	11.0599	99.9497	8
HICKORYLAKE-2 <>	555.686	279947	3.99441	12.7007	0.323449	2.16706	0.776862	0.199617	0.706325	0.909203	1173.26	7.57666	1170.54	5.39749	1165.48	6.42661	1165.48	6.42661	100.668	9
HICKORYLAKE-9 <>	496.671	1.46265e+06	5.06416	12.6497	0.482615	2.16101	1.3852	0.19826	1.29841	0.937343	1165.96	13.8488	1168.59	9.61582	1173.49	9.56943	1173.49	9.56943	99.3587	10
HICKORYLAKE-7 <>	325.361	176954	6.30284	12.626	0.554613	2.1763	1.08667	0.199288	0.934479	0.859949	1171.5	10.0103	1173.5	7.56017	1177.2	10.988	1177.2	10.988	99.5153	11
HICKORYLAKE-11 <>	426.232	457166	4.9091	12.6155	0.476143	2.16103	0.960024	0.197726	0.833627	0.86834	1163.09	8.87149	1168.6	6.66424	1178.85	9.43369	1178.85	9.43369	98.6637	12
	675.214		9.21622													UI	1153±22 Ma
	643.78		6.44157
Older Group
HICKORYLAKE-3 <>	429.196	242549	8.80522	12.7027	0.521297	2.14825	0.887152	0.197916	0.717836	0.809147	1164.11	7.64536	1164.49	6.1468	1165.16	10.3477	1165.16	10.3477	99.9098	1
HICKORYLAKE-8 <>	317.947	197923	6.56467	12.7011	0.557231	2.14999	0.998019	0.19805	0.827971	0.829614	1164.84	8.82336	1165.05	6.91676	1165.42	11.0599	1165.42	11.0599	99.9497	2
HICKORYLAKE-2 <>	555.686	279947	3.99441	12.7007	0.323449	2.16706	0.776862	0.199617	0.706325	0.909203	1173.26	7.57666	1170.54	5.39749	1165.48	6.42661	1165.48	6.42661	100.668	3
HICKORYLAKE-9 <>	496.671	1.46265e+06	5.06416	12.6497	0.482615	2.16101	1.3852	0.19826	1.29841	0.937343	1165.96	13.8488	1168.59	9.61582	1173.49	9.56943	1173.49	9.56943	99.3587	4
HICKORYLAKE-7 <>	325.361	176954	6.30284	12.626	0.554613	2.1763	1.08667	0.199288	0.934479	0.859949	1171.5	10.0103	1173.5	7.56017	1177.2	10.988	1177.2	10.988	99.5153	5
HICKORYLAKE-11 <>	426.232	457166	4.9091	12.6155	0.476143	2.16103	0.960024	0.197726	0.833627	0.86834	1163.09	8.87149	1168.6	6.66424	1178.85	9.43369	1178.85	9.43369	98.6637	6
	425.182		5.94007													CA	1168.4±2.8
	93.4055		1.6939													WA	1170.1±7.3
Younger Group
HICKORYLAKE-5 <>	279.392	186576	19.977	13.183	0.965224	1.92974	1.06721	0.184506	0.455275	0.426604	1091.55	4.57157	1091.45	7.13766	1091.24	19.3169	1091.24	19.3169	100.028	1
HICKORYLAKE-6 <>	295.282	323291	18.5158	13.132	0.474687	1.92744	0.841702	0.183573	0.695079	0.825802	1086.47	6.94972	1090.65	5.62711	1099.02	9.48975	1099.02	9.48975	98.8579	2
HICKORYLAKE-12 <>	516.103	99903.5	11.1701	13.0069	0.337351	2.01104	1.7403	0.189711	1.70729	0.981032	1119.81	17.5501	1119.24	11.8026	1118.16	6.74993	1118.16	6.74993	100.148	3
	363.592		16.5543													CA	1096.7±13
	132.317		4.71973													WA	1110±31

## Sheet: JF
Supplemental File S-1. U-Pb zircon geochronology of silicocarbonate pegmatite samples.
Age and Origin of Silicocarbonate Pegmatites of the Adirondack Region
Authors - Chiarenzelli, Lupulescu, Robinson, Bailey, Singer
Jenne Farm	N44.418o	W75.155o
							Isotope ratios						Apparent ages (Ma)
Analysis	U	206Pb	U/Th	206Pb*	±	207Pb*	±	206Pb*	±	error	206Pb*	±	207Pb*	±	206Pb*	±	Best age	±	Conc	Analyses
	(ppm)	204Pb		207Pb*	(%)	235U*	(%)	238U	(%)	corr.	238U*	(Ma)	235U	(Ma)	207Pb*	(Ma)	(Ma)	(Ma)	(%)	n
All data
JF Spot 25	3255.32	96114.7	25.5364	13.9798	1.36983	0.584081	4.5003	0.0592207	4.28675	0.952549	370.885	15.4502	467.081	16.8503	972.666	27.9165	370.885	15.4502	NA	1
JF Spot 7	2607.47	422081	22.7919	16.9881	1.38606	0.482509	3.17975	0.0594498	2.86176	0.899994	372.278	10.3519	399.793	10.5086	562.071	30.182	372.278	10.3519	NA	2
JF Spot 24	1385.76	410305	39.074	14.4582	1.45408	1.16637	2.51198	0.122306	2.04835	0.81543	743.824	14.39	784.944	13.7333	903.642	29.9666	743.824	14.39	82.3141	3
JF Spot 13	1399.93	132508	12.2413	14.2162	1.09215	1.19949	2.09794	0.123675	1.79124	0.85381	751.681	12.7091	800.353	11.6176	938.337	22.3908	751.681	12.7091	80.1078	4
JF Spot 17	1414.21	204894	42.6847	14.2104	1.28932	1.23756	2.8222	0.127547	2.51047	0.889544	773.858	18.3067	817.777	15.8506	939.185	26.4494	773.858	18.3067	82.3967	5
JF Spot 10	923.366	136002	38.3872	14.267	1.30357	1.24864	3.22661	0.129201	2.95156	0.914757	783.308	21.7705	822.79	18.1945	931.029	26.7574	783.308	21.7705	84.1336	6
JF Spot 20	925.485	288909	35.5536	14.1697	0.944379	1.26234	3.3366	0.129729	3.20016	0.959109	786.32	23.6895	828.959	18.9061	945.087	19.3496	786.32	23.6895	83.2008	7
JF Spot 12	1374.7	93076.7	54.5097	14.2873	1.36095	1.25496	2.95741	0.130041	2.62566	0.887824	788.097	19.478	825.641	16.7137	928.145	27.9469	788.097	19.478	84.9111	8
JF Spot 11	1055.46	561672	17.6081	13.8237	1.03079	1.31988	2.32438	0.13233	2.08332	0.89629	801.144	15.695	854.461	13.4286	995.505	20.9289	801.144	15.695	80.4761	9
JF Spot 13-2	878.68	322135	17.3223	14.0813	1.24432	1.29677	3.65946	0.132435	3.44141	0.940415	801.744	25.9446	844.296	20.9824	957.867	25.439	801.744	25.9446	83.7009	10
JF Spot 6	721.074	207618	21.356	13.8531	1.37775	1.31822	3.16945	0.132445	2.85434	0.900577	801.798	21.52	853.735	18.3018	991.202	27.9996	801.798	21.52	80.8915	11
JF Spot 3	969.386	558146	33.9855	14.0756	1.6664	1.31398	4.57185	0.134139	4.25734	0.931207	811.434	32.46	851.877	26.3663	958.691	34.0518	811.434	32.46	84.6397	12
JF Spot 6-2	1373.9	81053	31.4237	13.9151	1.07763	1.33008	2.0667	0.134234	1.76351	0.853298	811.972	13.4541	858.915	11.9794	982.127	21.9271	811.972	13.4541	82.6749	13
JF Spot 27	41.7011	177256	2.26794	14.2039	1.70366	1.52655	2.61245	0.15726	1.98052	0.758107	941.53	17.3494	941.112	16.0286	940.114	34.9273	940.114	34.9273	100.151	14
JF Spot 33	798.271	157896	23.262	14.0933	1.36184	1.45345	3.46235	0.148564	3.18328	0.919399	892.909	26.5433	911.302	20.8298	956.111	27.8363	956.111	27.8363	93.3896	15
JF Spot 22	879.436	105911	32.2486	14.0408	1.34449	1.53836	2.67071	0.156657	2.30761	0.864041	938.173	20.1478	945.848	16.4362	963.777	27.4386	963.777	27.4386	97.3434	16
JF Spot 32-2	745.069	522075	30.9798	13.9909	1.31851	1.47543	2.13343	0.149714	1.67721	0.786159	899.362	14.0793	920.359	12.9122	971.052	26.8919	971.052	26.8919	92.6173	17
JF Spot 10-2	1011.22	305600	49.8508	13.9639	1.18556	1.57587	1.92322	0.159597	1.51434	0.787397	954.535	13.4356	960.741	11.9474	974.972	24.1661	974.972	24.1661	97.9038	18
JF Spot 22-2	30.7143	61127.7	2.01127	13.8679	2.42675	1.58811	3.50714	0.159731	2.53198	0.721949	955.283	22.4808	965.555	21.8549	989.016	49.373	989.016	49.373	96.5892	19
JF Spot 9	1025.2	65679.7	33.7858	13.7658	1.14904	1.53918	2.84269	0.15367	2.60011	0.914666	921.502	22.3264	946.175	17.4984	1004.02	23.3223	1004.02	23.3223	91.7813	20
JF Spot 19-2	385.045	63838.6	13.7322	13.685	1.16675	1.72152	2.18309	0.170866	1.84515	0.845202	1016.88	17.358	1016.59	14.0226	1015.95	23.6378	1015.95	23.6378	100.091	21
JF Spot 26	1210.65	264406	18.8028	13.6692	0.896032	1.45042	1.45255	0.143792	1.14326	0.787067	866.072	9.26513	910.047	8.73023	1018.29	18.1467	1018.29	18.1467	85.0517	22
JF Spot 34-2	749.285	154633	18.0257	13.6125	1.46376	1.71568	2.73488	0.169384	2.31019	0.844712	1008.71	21.5715	1014.41	17.5456	1026.7	29.6261	1026.7	29.6261	98.2478	23
JF Spot 23	1208.86	123626	17.3511	13.5428	1.0772	1.45641	1.98498	0.143051	1.66727	0.839943	861.889	13.4508	912.525	11.9506	1037.08	21.7725	1037.08	21.7725	83.1071	24
JF Spot 31	26.5765	21979.6	2.20246	13.5168	2.36665	1.58594	3.65208	0.155474	2.78149	0.761617	931.577	24.1266	964.703	22.7463	1040.96	47.7904	1040.96	47.7904	89.4925	25
JF Spot 27-2	1396.67	357997	24.6591	13.4635	1.38469	1.85121	3.07672	0.180765	2.74752	0.893001	1071.15	27.1152	1063.86	20.2863	1048.96	27.9332	1048.96	27.9332	102.116	26
JF Spot 29	32.1659	163517	1.98863	13.447	2.53637	1.60841	3.29789	0.156864	2.10783	0.639144	939.326	18.4245	973.491	20.6513	1051.43	51.1272	1051.43	51.1272	89.338	27
JF Spot 32	27.8527	46840.9	2.39309	13.4192	3.02992	1.58572	3.90437	0.154331	2.46245	0.630691	925.195	21.2231	964.619	24.317	1055.61	61.0504	1055.61	61.0504	87.6459	28
JF Spot 28	31.1738	31374.9	2.36349	13.4094	2.76424	1.5904	3.47168	0.154673	2.10037	0.605001	927.103	18.1372	966.453	21.6459	1057.08	55.6639	1057.08	55.6639	87.7044	29
JF Spot 25-2	29.6019	69041.6	2.27025	13.386	2.10611	1.54474	2.72098	0.149969	1.7228	0.633153	900.791	14.4834	948.395	16.7728	1060.6	42.4003	1060.6	42.4003	84.9324	30
JF Spot 35	22.2667	29230.5	2.41323	13.3485	2.31294	1.62927	3.46807	0.157734	2.58414	0.745124	944.17	22.6961	981.578	21.8244	1066.24	46.5096	1066.24	46.5096	88.5515	31
JF Spot 21	23.0861	187949	2.40808	13.0745	2.95484	1.60036	3.75793	0.151755	2.32184	0.617851	910.793	19.7213	970.35	23.4877	1107.78	59.0361	1107.78	59.0361	82.2181	32
JF Spot 11-2	789.269	225308	9.34405	13.0072	1.79751	1.69487	4.05542	0.159889	3.6353	0.896405	956.162	32.3047	1006.6	25.9035	1118.11	35.8559	1118.11	35.8559	85.5163	33
JF Spot 29-2	28.4352	26077.3	2.12685	13.0053	3.08934	1.72682	3.76414	0.162879	2.15051	0.571316	972.759	19.4175	1018.57	24.2085	1118.4	61.6468	1118.4	61.6468	86.9775	34
JF Spot 12-2	565.368	61805.1	4.08136	12.7507	1.32313	1.82244	3.54024	0.168533	3.28369	0.927533	1004.02	30.5301	1053.56	23.2149	1157.69	26.2653	1157.69	26.2653	86.7263	35
JF Spot 18-2	447.7	89295.5	14.6536	12.7095	1.97627	1.84268	3.11031	0.169855	2.40175	0.772189	1011.31	22.4798	1060.82	20.4745	1164.1	39.1682	1164.1	39.1682	86.8746	36
JF Spot 26-2	532.241	161554	6.60017	10.005	1.46204	3.19807	2.50641	0.232063	2.03581	0.812242	1345.3	24.719	1456.69	19.3898	1623.13	27.2008	1623.13	27.2008	82.8831	37
	827.51		19.6027													UI	1068±37
	721.808		15.1819
Single Concordant Point
JF Spot 27-2	1396.67	357997	24.6591	13.4635	1.38469	1.85121	3.07672	0.180765	2.74752	0.893001	1071.15	27.1152	1063.86	20.2863	1048.96	27.9332	1048.96	27.9332	102.116	1
	1397		24.7													CA	1060±19
Inherited (>1623 Ma)
JF Spot 26-2	532.241	161554	6.60017	10.005	1.46204	3.19807	2.50641	0.232063	2.03581	0.812242	1345.3	24.719	1456.69	19.3898	1623.13	27.2008	1623.13	27.2008	82.8831	1
																7/6	1623±27.2

## Sheet: KV
Supplemental File S-1. U-Pb zircon geochronology of silicocarbonate pegmatite samples.
Age and Origin of Silicocarbonate Pegmatites of the Adirondack Region
Authors - Chiarenzelli, Lupulescu, Robinson, Bailey, Singer
Keene Valley	N44.222o	W73.791o
							Isotope ratios						Apparent ages (Ma)
Analysis	U	206Pb	U/Th	206Pb*	±	207Pb*	±	206Pb*	±	error	206Pb*	±	207Pb*	±	206Pb*	±	Best age	±	Conc	Analyses
	(ppm)	204Pb		207Pb*	(%)	235U*	(%)	238U	(%)	corr.	238U*	(Ma)	235U	(Ma)	207Pb*	(Ma)	(Ma)	(Ma)	(%)	n
All data
KEENVALLEY-4 <>	110.379	46935.9	3.93541	13.7751	2.15016	1.72924	2.61034	0.172761	1.48011	0.567016	1027.31	14.0556	1019.47	16.795	1002.65	43.673	1002.65	43.673	102.459	1
KEENVALLEY-5 <>	114.711	84901	3.83859	13.7436	1.74366	1.74797	2.0195	0.174233	1.01883	0.504495	1035.39	9.7453	1026.41	13.0442	1007.3	35.3734	1007.3	35.3734	102.789	2
KEENVALLEY-10 <>	144.012	117524	7.73284	13.7175	0.980882	1.7105	1.24058	0.170176	0.759552	0.612254	1013.08	7.1207	1012.47	7.94948	1011.14	19.8865	1011.14	19.8865	100.191	3
KEENVALLEY-18 <>	160.604	76180.5	3.91754	13.7161	1.39896	1.74629	1.56195	0.173718	0.694693	0.444759	1032.57	6.62816	1025.79	10.0852	1011.35	28.3437	1011.35	28.3437	102.098	4
KEENVALLEY-13 <>	146.337	156042	4.53263	13.7101	1.36905	1.75782	1.62921	0.174789	0.883191	0.542098	1038.44	8.47086	1030.04	10.5446	1012.23	27.7503	1012.23	27.7503	102.589	5
KEENVALLEY-8 <>	183.654	175009	4.5516	13.6699	1.01648	1.70271	1.22303	0.168812	0.680124	0.556098	1005.56	6.33236	1009.55	7.82378	1018.19	20.5866	1018.19	20.5866	98.7602	6
KEENVALLEY-2 <>	150.673	155453	3.61144	13.6475	1.49045	1.71618	1.79593	0.169869	1.00196	0.557906	1011.39	9.37877	1014.6	11.5224	1021.51	30.18	1021.51	30.18	99.0094	7
KEENVALLEY-19 <>	168.896	71354.7	3.87309	13.6472	1.31471	1.764	1.60857	0.174599	0.926843	0.57619	1037.4	8.88132	1032.32	10.4243	1021.55	26.6195	1021.55	26.6195	101.552	8
KEENVALLEY-17 <>	166.248	127229	4.67232	13.647	0.748116	1.75954	1.10849	0.174154	0.817967	0.737912	1034.96	7.82101	1030.68	7.1768	1021.58	15.1429	1021.58	15.1429	101.31	9
KEENVALLEY-12 <>	224.265	90025.2	4.67575	13.6297	0.691134	1.75872	1.20893	0.173853	0.991888	0.820469	1033.31	9.47	1030.38	7.82579	1024.15	13.9856	1024.15	13.9856	100.894	10
KEENVALLEY-14 <>	153.686	150744	4.72342	13.6209	0.802018	1.75288	0.961977	0.173164	0.531194	0.55219	1029.52	5.05442	1028.23	6.21964	1025.45	16.2249	1025.45	16.2249	100.397	11
KEENVALLEY-1 <>	131.79	70640.9	4.43995	13.6184	2.15243	1.74562	2.353	0.172415	0.950614	0.404001	1025.4	9.01191	1025.54	15.1913	1025.82	43.5459	1025.82	43.5459	99.9592	12
KEENVALLEY-16 <>	109.924	129932	3.61288	13.6118	1.83162	1.73835	1.97459	0.171614	0.737698	0.373595	1021	6.96569	1022.85	12.7285	1026.8	37.068	1026.8	37.068	99.4345	13
KEENVALLEY-6 <>	218.287	139851	4.46803	13.6019	1.13994	1.75419	1.3363	0.173051	0.697294	0.521811	1028.9	6.6312	1028.71	8.64224	1028.28	23.0702	1028.28	23.0702	100.06	14
KEENVALLEY-9 <>	125.124	60499.2	7.40963	13.5931	0.908404	1.72879	1.18783	0.170434	0.76534	0.644317	1014.5	7.18428	1019.3	7.64125	1029.59	18.3845	1029.59	18.3845	98.5346	15
KEENVALLEY-3 <>	170.372	366573	4.31998	13.5848	1.4784	1.76261	1.75176	0.173663	0.939689	0.536424	1032.26	8.96329	1031.81	11.3491	1030.82	29.9041	1030.82	29.9041	100.14	16
KEENVALLEY-20 <>	183.756	168491	4.00356	13.5838	1.20477	1.76977	1.59596	0.174355	1.04672	0.655857	1036.06	10.0181	1034.43	10.3548	1030.97	24.3721	1030.97	24.3721	100.494	17
KEENVALLEY-11 <>	194.137	176935	4.69251	13.5414	0.771157	1.74761	0.982502	0.171635	0.608791	0.619634	1021.11	5.74909	1026.28	6.34539	1037.29	15.592	1037.29	15.592	98.44	18
KEENVALLEY-7 <>	102.02	46548.5	4.19128	13.4655	1.98571	1.75655	2.25123	0.171546	1.06065	0.471142	1020.62	10.0118	1029.58	14.5671	1048.67	40.0402	1048.67	40.0402	97.3256	19
KEENVALLEY-15 <>	170.256	2362.68	3.82508	13.1088	3.21389	1.84583	3.43061	0.17549	1.20001	0.349795	1042.29	11.5488	1061.94	22.5973	1102.57	64.2846	1102.57	64.2846	94.5332	20
	156.457		4.55138													CA	1025.0±1.7
	33.8087		1.0704													WA	1024±10
Older analysis (ca. >1103 Ma)
KEENVALLEY-15 <>	170.256	2362.68	3.82508	13.1088	3.21389	1.84583	3.43061	0.17549	1.20001	0.349795	1042.29	11.5488	1061.94	22.5973	1102.57	64.2846	1102.57	64.2846	94.5332	1
	170		3.8													7/6	>1102±64

## Sheet: NB
Supplemental File S-1. U-Pb zircon geochronology of silicocarbonate pegmatite samples.
Age and Origin of Silicocarbonate Pegmatites of the Adirondack Region
Authors - Chiarenzelli, Lupulescu, Robinson, Bailey, Singer
Natural Bridge	N44.074o	W75.473o
							Isotope ratios						Apparent ages (Ma)
Analysis	U	206Pb	U/Th	206Pb*	±	207Pb*	±	206Pb*	±	error	206Pb*	±	207Pb*	±	206Pb*	±	Best age	±	Conc	Analyses
	(ppm)	204Pb		207Pb*	(%)	235U*	(%)	238U	(%)	corr.	238U*	(Ma)	235U	(Ma)	207Pb*	(Ma)	(Ma)	(Ma)	(%)	n
All data
Spot 65	601.261	37884.5	6.66592	12.9425	0.868439	2.04028	2.46532	0.1916	2.3073	0.935901	1130.04	23.916	1129.05	16.8004	1128.05	17.3195	1128.05	17.3195	100.176	1
Spot 57	668.076	63978.8	6.34607	12.9177	0.853065	2.04492	2.85418	0.191668	2.72372	0.95429	1130.41	28.2409	1130.6	19.4655	1131.84	17.0053	1131.84	17.0053	99.8736	2
Spot 40	884.111	211129	7.25097	12.8773	0.903376	2.08043	2.28371	0.194387	2.09744	0.918434	1145.1	22.0055	1142.38	15.662	1138.1	17.9527	1138.1	17.9527	100.615	3
Spot 42	659.954	47044.2	6.52173	12.8773	0.838273	2.0367	2.94552	0.1903	2.82372	0.958648	1123	29.1021	1127.86	20.062	1138.11	16.6569	1138.11	16.6569	98.6724	4
Spot 68	762.295	90740.2	8.1112	12.8755	1.07165	2.09017	2.73498	0.195269	2.51628	0.920038	1149.86	26.5001	1145.58	18.7859	1138.38	21.2989	1138.38	21.2989	101.008	5
Spot 48	708.706	356401	8.24246	12.8548	0.834391	2.04757	2.54597	0.190982	2.40536	0.944771	1126.69	24.865	1131.49	17.3705	1141.55	16.5846	1141.55	16.5846	98.6988	6
Spot 63	642.466	686787	5.9071	12.8541	0.936554	2.00831	2.11914	0.18731	1.90095	0.89704	1106.78	19.3325	1118.32	14.3657	1141.7	18.6138	1141.7	18.6138	96.942	7
Spot 46	454.23	32830.8	7.44147	12.8329	1.03975	2.08985	2.49727	0.194593	2.27053	0.909203	1146.21	23.8426	1145.48	17.152	1144.98	20.6449	1144.98	20.6449	100.108	8
Spot 69	697.872	266979	6.69378	12.83	0.800509	2.08791	2.63615	0.194369	2.51166	0.952778	1145	26.3494	1144.84	18.1006	1145.41	15.8976	1145.41	15.8976	99.964	9
Spot 41	641.807	63054.6	6.89466	12.8255	0.860122	2.03585	2.41762	0.189457	2.25944	0.934573	1118.43	23.1997	1127.58	16.4635	1146.11	17.0765	1146.11	17.0765	97.5845	10
Spot 44	654.199	131201	8.69038	12.7854	0.823901	2.13383	2.42057	0.197953	2.27603	0.94029	1164.32	24.245	1159.83	16.7367	1152.3	16.3372	1152.3	16.3372	101.043	11
Spot 56	665.723	142432	6.01144	12.7847	0.879853	2.05563	2.68621	0.190688	2.53803	0.944836	1125.1	26.2024	1134.17	18.3511	1152.41	17.4652	1152.41	17.4652	97.6299	12
Spot 45	656.065	145979	6.42053	12.7823	1.086	2.0593	2.97295	0.190994	2.76749	0.930892	1126.76	28.61	1135.39	20.3223	1152.78	21.5578	1152.78	21.5578	97.7428	13
Spot 53	800.491	243616	8.1749	12.7767	0.83374	2.09538	2.3363	0.194254	2.18247	0.934156	1144.38	22.8844	1147.29	16.0599	1153.65	16.5291	1153.65	16.5291	99.196	14
Spot 38	654.151	57889.6	6.01133	12.7574	0.932243	2.01987	2.01978	0.186971	1.79177	0.887111	1104.94	18.1943	1122.21	13.7182	1156.65	18.495	1156.65	18.495	95.5298	15
Spot 55	697.932	81391.7	9.33089	12.7332	0.752832	2.02675	2.46791	0.187251	2.35028	0.952337	1106.47	23.8958	1124.53	16.7812	1160.42	14.9267	1160.42	14.9267	95.3504	16
Spot 60	624.488	1.183e+06	5.96405	12.7286	0.915195	2.08472	2.49643	0.192537	2.32263	0.930378	1135.1	24.1736	1143.79	17.1326	1161.14	18.1507	1161.14	18.1507	97.7576	17
Spot 66	695.03	53060.1	7.55975	12.7217	0.790094	2.09528	2.62624	0.193409	2.50458	0.953673	1139.82	26.1663	1147.26	18.0531	1162.2	15.672	1162.2	15.672	98.0735	18
Spot 43	721.805	51562.9	8.4781	12.721	1.17347	2.09436	3.48178	0.193313	3.27808	0.941494	1139.3	34.2332	1146.96	23.9327	1162.31	23.2801	1162.31	23.2801	98.0196	19
Spot 54	739.022	134948	8.48692	12.7031	0.944878	2.06485	2.72773	0.190321	2.55886	0.938088	1123.11	26.3748	1137.23	18.6621	1165.11	18.7316	1165.11	18.7316	96.3958	20
Spot 52	643.753	234315	5.49384	12.6876	1.05145	2.10371	2.88991	0.193666	2.69184	0.931463	1141.2	28.1541	1150.02	19.8918	1167.52	20.8391	1167.52	20.8391	97.7461	21
Spot 37	686.839	102808	8.47608	12.6786	0.825696	2.06891	2.09382	0.190327	1.92414	0.918961	1123.14	19.8331	1138.57	14.3336	1168.94	16.3689	1168.94	16.3689	96.0827	22
Spot 59	622.741	133911	6.62427	12.6706	0.818359	2.0449	2.71454	0.188	2.58824	0.953475	1110.53	26.4038	1130.6	18.5128	1170.18	16.2216	1170.18	16.2216	94.9025	23
Spot 49	642.43	70116.7	5.35542	12.6682	1.00011	2.13679	2.96364	0.196411	2.78979	0.94134	1156.01	29.5242	1160.78	20.5017	1170.59	19.8036	1170.59	19.8036	98.7543	24
Spot 47	674.337	62153	5.65864	12.6529	0.956707	2.0863	3.29547	0.191538	3.15354	0.956933	1129.7	32.6789	1144.31	22.6234	1172.99	18.9474	1172.99	18.9474	96.3095	25
Spot 61	669.641	90473.2	6.06524	12.6411	0.927436	2.07507	2.03564	0.190329	1.8121	0.890185	1123.16	18.6784	1140.61	13.9488	1174.84	18.3695	1174.84	18.3695	95.6009	26
Spot 70	696.401	110000	6.53497	12.6166	0.974115	2.08958	2.36658	0.191289	2.1568	0.911358	1128.35	22.3255	1145.39	16.2535	1178.67	19.2676	1178.67	19.2676	95.7306	27
Spot 58	674.394	62235.1	6.25659	12.5999	0.817878	2.10692	2.66897	0.192621	2.54056	0.95189	1135.56	26.4516	1151.07	18.3797	1181.29	16.1866	1181.29	16.1866	96.1289	28
Spot 62	633.348	55565.8	5.72232	12.5962	0.908238	2.10339	1.98269	0.192241	1.76243	0.888909	1133.5	18.3194	1149.92	13.6456	1181.87	17.9622	1181.87	17.9622	95.9072	29
Spot 51	705.305	151355	8.16229	12.5936	1.02936	2.09573	2.53343	0.191502	2.31488	0.913734	1129.51	23.9844	1147.41	17.4162	1182.28	20.3572	1182.28	20.3572	95.5367	30
Spot 50	764.466	105154	7.21768	12.5632	0.928845	2.13791	2.20221	0.194884	1.99674	0.906699	1147.78	20.9938	1161.15	15.236	1187.06	18.3461	1187.06	18.3461	96.6907	31
Spot 67	759.823	1.13974e+06	8.46967	12.5599	0.846121	2.093	2.54004	0.19074	2.39497	0.942887	1125.38	24.7312	1146.51	17.4543	1187.58	16.6927	1187.58	16.6927	94.763	32
Spot 36	661.506	50221.8	5.89106	12.4976	1.10108	2.08671	3.49309	0.189225	3.31501	0.94902	1117.17	34.0034	1144.44	23.9821	1197.38	21.7149	1197.38	21.7149	93.3018	33
Spot 64	644.402	25917	6.10193	12.4904	1.06042	2.11233	2.22633	0.191437	1.95756	0.879279	1129.16	20.2764	1152.84	15.3436	1198.49	20.8958	1198.49	20.8958	94.2151	34
Spot 39	673.706	126527	6.00831	12.402	0.908714	2.11416	2.84243	0.190247	2.69325	0.94752	1122.71	27.751	1153.43	19.5961	1212.5	17.901	1212.5	17.901	92.5944	35
	679.508		6.94977													UI*	1167.6±7.6				*Anchored at 250±50 Ma
	68.6217		1.10752													CA	1145.7±2.8
																WA	1162.1±6.9

## Sheet: PF
Supplemental File S-1. U-Pb zircon geochronology of silicocarbonate pegmatite samples.
Age and Origin of Silicocarbonate Pegmatites of the Adirondack Region
Authors - Chiarenzelli, Lupulescu, Robinson, Bailey, Singer
Powers Farm	N44.556o	W75.021o
							Isotope ratios						Apparent ages (Ma)
Analysis	U	206Pb	U/Th	206Pb*	±	207Pb*	±	206Pb*	±	error	206Pb*	±	207Pb*	±	206Pb*	±	Best age	±	Conc	Analyses
	(ppm)	204Pb		207Pb*	(%)	235U*	(%)	238U	(%)	corr.	238U*	(Ma)	235U	(Ma)	207Pb*	(Ma)	(Ma)	(Ma)	(%)	n
All data
PF-4 <>	146.784	159285	4.57252	12.8448	0.872524	2.12241	1.24231	0.197722	0.884326	0.711841	1163.07	9.41088	1156.12	8.57451	1143.11	17.3397	1143.11	17.3397	101.747	1
PF-19 <>	288.773	173696	4.21235	12.8371	0.637929	2.1454	1.1496	0.199744	0.956363	0.831908	1173.95	10.2642	1163.57	7.96193	1144.28	12.6718	1144.28	12.6718	102.592	2
PF-8 <>	270.899	235114	3.9746	12.8238	0.640407	2.1217	1.3865	0.197333	1.22974	0.886938	1160.98	13.0652	1155.89	9.56875	1146.34	12.7234	1146.34	12.7234	101.277	3
PF-18 <>	282.046	273652	3.51291	12.8233	0.529256	2.14144	0.964349	0.199161	0.806137	0.835939	1170.81	8.63086	1162.29	6.67494	1146.43	10.5155	1146.43	10.5155	102.127	4
PF-10 <>	269.923	257701	3.50647	12.8215	0.441805	2.14349	1.17924	0.199325	1.09335	0.927165	1171.69	11.7139	1162.95	8.16489	1146.72	8.75975	1146.72	8.75975	102.177	5
PF-11 <>	200.006	135064	1.14595	12.812	0.899934	2.1628	1.31779	0.20097	0.962644	0.7305	1180.53	10.3844	1169.17	9.15022	1148.22	17.8734	1148.22	17.8734	102.814	6
PF-20 <>	274.519	223094	3.12998	12.7997	0.613961	2.13929	1.22422	0.198594	1.05914	0.865152	1167.76	11.3127	1161.59	8.47107	1150.11	12.174	1150.11	12.174	101.535	7
PF-12 <>	410.006	359784	3.2558	12.7967	0.172369	2.13921	1.07857	0.198541	1.0647	0.987147	1167.48	11.3696	1161.57	7.46307	1150.55	3.42123	1150.55	3.42123	101.471	8
PF-7 <>	284.656	133773	3.40759	12.7967	0.917898	2.1304	1.4959	0.197724	1.18118	0.78961	1163.08	12.57	1158.72	10.3373	1150.56	18.2262	1150.56	18.2262	101.089	9
PF-17 <>	354.284	494578	3.7949	12.7943	0.444353	2.15089	0.994404	0.199588	0.889601	0.894607	1173.11	9.54148	1165.34	6.89262	1150.93	8.81527	1150.93	8.81527	101.927	10
PF-9 <>	352.09	289300	3.96567	12.7941	0.556611	2.13856	1.18762	0.19844	1.04911	0.88337	1166.94	11.1983	1161.36	8.21692	1150.96	11.0448	1150.96	11.0448	101.388	11
PF-15 <>	401.474	256731	2.80021	12.7894	0.404155	2.11796	0.866714	0.196456	0.766715	0.884623	1156.26	8.11562	1154.67	5.97803	1151.68	8.0155	1151.68	8.0155	100.397	12
PF-14 <>	287.144	331017	3.18598	12.783	0.382563	2.15727	1.74636	0.200003	1.70394	0.975711	1175.33	18.3075	1167.39	12.1165	1152.68	7.57549	1152.68	7.57549	101.966	13
PF-1 <>	278.449	201665	3.79231	12.7715	0.459509	2.12254	1.65237	0.196605	1.58719	0.960555	1157.06	16.811	1156.16	11.4052	1154.47	9.10015	1154.47	9.10015	100.225	14
PF-16 <>	402.216	360513	2.67398	12.7707	0.511294	2.12672	0.872104	0.19698	0.706501	0.810111	1159.08	7.49492	1157.52	6.02316	1154.59	10.1466	1154.59	10.1466	100.389	15
PF-6 <>	304.677	256812	4.13262	12.7532	0.597129	2.13587	1.45802	0.197557	1.33013	0.912288	1162.18	14.1452	1160.49	10.0838	1157.3	11.827	1157.3	11.827	100.422	16
PF-13 <>	708.939	580146	4.46293	12.7462	0.422536	2.17922	0.787988	0.201457	0.665122	0.844077	1183.14	7.18941	1174.43	5.48446	1158.39	8.363	1158.39	8.363	102.136	17
PF-2 <>	218.309	231908	3.89651	12.7355	0.818672	2.14537	1.14392	0.19816	0.798958	0.698437	1165.43	8.51813	1163.56	7.92256	1160.06	16.2449	1160.06	16.2449	100.463	18
PF-3 <>	298.19	217229	3.03647	12.7252	0.523069	2.15596	1.66264	0.198976	1.57822	0.949224	1169.82	16.8841	1166.97	11.5334	1161.67	10.3826	1161.67	10.3826	100.702	19
PF-5 <>	228.533	209207	4.34028	12.7162	0.884997	2.12046	1.15066	0.195563	0.735391	0.639104	1151.44	7.75445	1155.49	7.93957	1163.06	17.5406	1163.06	17.5406	99.0009	20
	313.096		3.54													UI	1152±9.4
	115.006		0.783492													CA	1161.4±1.8
																WA	1151.8±3.9

## Sheet: RR
Supplemental File S-1. U-Pb zircon geochronology of silicocarbonate pegmatite samples.
Age and Origin of Silicocarbonate Pegmatites of the Adirondack Region
Authors - Chiarenzelli, Lupulescu, Robinson, Bailey, Singer
Rose Road	N44.200o	W75.233o
							Isotope ratios						Apparent ages (Ma)
Analysis	U	206Pb	U/Th	206Pb*	±	207Pb*	±	206Pb*	±	error	206Pb*	±	207Pb*	±	206Pb*	±	Best age	±	Conc	Analyses
	(ppm)	204Pb		207Pb*	(%)	235U*	(%)	238U	(%)	corr.	238U*	(Ma)	235U	(Ma)	207Pb*	(Ma)	(Ma)	(Ma)	(%)	n
All data
RR-11 <>	495.828	504590	33.9011	13.5482	0.407487	1.82419	1.33749	0.179246	1.27391	0.95246	1062.85	12.4825	1054.19	8.77218	1036.28	8.22911	1036.28	8.22911	102.565	1
RR-12 <>	497.967	491305	32.7841	13.5089	0.41474	1.83664	1.44256	0.179946	1.38165	0.95778	1066.68	13.5831	1058.66	9.48408	1042.14	8.38774	1042.14	8.38774	102.355	2
RR-13 <>	441.026	435969	33.8771	13.4654	0.342819	1.84012	1.22975	0.179707	1.181	0.960357	1065.37	11.5973	1059.9	8.0903	1048.68	6.93014	1048.68	6.93014	101.592	3
RR-14 <>	459.366	377496	33.866	13.4575	0.333442	1.8429	1.7665	0.179873	1.73474	0.982023	1066.28	17.0485	1060.9	11.6279	1049.86	6.73965	1049.86	6.73965	101.564	4
RR-23 <>	107.01	5384.9	0.436532	13.0903	1.51795	1.84688	1.9264	0.175343	1.1861	0.615709	1041.48	11.4068	1062.32	12.6902	1105.39	30.3251	1105.39	30.3251	94.2184	5
RR-22 <>	108.171	6957.45	0.61058	12.9224	1.47009	2.01	2.73502	0.188382	2.30633	0.84326	1112.61	23.5682	1118.89	18.5468	1131.14	29.2559	1131.14	29.2559	98.3615	6
RR-5 <>	44.6194	3743.4	0.626773	12.9151	5.10662	1.83549	5.63996	0.171928	2.39407	0.424484	1022.73	22.6414	1058.25	37.087	1132.25	101.753	1132.25	101.753	90.3266	7
RR-15 <>	52.3009	2674.93	2.46709	12.7713	2.57088	2.03537	2.95843	0.188528	1.46385	0.494807	1113.4	14.9686	1127.41	20.1456	1154.5	51.0128	1154.5	51.0128	96.4398	8
RR-10 <>	269.329	10806.8	0.92085	12.6966	0.424976	2.07738	2.44718	0.191295	2.41	0.984806	1128.39	24.9472	1141.37	16.7753	1166.12	8.43786	1166.12	8.43786	96.7646	9
RR-9 <>	211.696	7266.1	0.792861	12.6932	0.727314	2.13791	2.60048	0.196816	2.4967	0.960092	1158.19	26.4679	1161.15	17.9919	1166.65	14.4267	1166.65	14.4267	99.2753	10
RR-8 <>	238.382	10380.5	0.817505	12.6664	0.600755	2.05787	2.5038	0.189047	2.43066	0.970789	1116.21	24.9124	1134.91	17.1108	1170.88	11.9116	1170.88	11.9116	95.3313	11
RR-4 <>	25.5927	1768.76	0.276339	12.6316	2.7012	2.01699	3.26495	0.184783	1.83396	0.561712	1093.05	18.4388	1121.25	22.1669	1176.32	53.4471	1176.32	53.4471	92.9211	12
RR-6 <>	151.778	6549.83	1.52114	12.6075	0.647351	2.13382	2.1966	0.195113	2.09904	0.955588	1149.01	22.0912	1159.83	15.1879	1180.1	12.7989	1180.1	12.7989	97.3658	13
RR-18 <>	43.9913	2627	2.31007	12.5629	3.08409	2.08203	4.03034	0.189704	2.59461	0.643771	1119.77	26.6705	1142.9	27.6522	1187.1	60.9275	1187.1	60.9275	94.3282	14
RR-17 <>	42.2121	2257.51	2.14559	12.5483	3.43882	2.0916	3.97423	0.190354	1.99224	0.501291	1123.29	20.5376	1146.05	27.3076	1189.4	67.9309	1189.4	67.9309	94.4425	15
RR-16 <>	42.2764	1946.97	1.99666	12.5457	2.20056	2.04336	3.8473	0.185925	3.15583	0.820271	1099.26	31.8945	1130.08	26.2346	1189.81	43.4685	1189.81	43.4685	92.3896	16
RR-7 <>	128.206	6623.44	1.31841	12.5453	1.03497	2.05266	2.35211	0.186765	2.11217	0.897988	1103.83	21.4279	1133.18	16.0606	1189.87	20.4466	1189.87	20.4466	92.769	17
RR-2 <>	115.342	70561.3	1.14745	11.4418	0.624569	2.88607	1.48679	0.239498	1.34924	0.907487	1384.09	16.806	1378.28	11.2122	1369.28	12.0212	1369.28	12.0212	101.081	18
RR-1 <>	79.8832	249342	1.02124	11.375	0.891171	2.8672	2.93807	0.236541	2.79966	0.952889	1368.69	34.5244	1373.34	22.1219	1380.55	17.1258	1380.55	17.1258	99.1406	19
	187.104		8.04408
	153.576		12.398
Younger Group (ca. 1055 Ma)
RR-11 <>	495.828	504590	33.9011	13.5482	0.407487	1.82419	1.33749	0.179246	1.27391	0.95246	1062.85	12.4825	1054.19	8.77218	1036.28	8.22911	1036.28	8.22911	102.565	1
RR-12 <>	497.967	491305	32.7841	13.5089	0.41474	1.83664	1.44256	0.179946	1.38165	0.95778	1066.68	13.5831	1058.66	9.48408	1042.14	8.38774	1042.14	8.38774	102.355	2
RR-13 <>	441.026	435969	33.8771	13.4654	0.342819	1.84012	1.22975	0.179707	1.181	0.960357	1065.37	11.5973	1059.9	8.0903	1048.68	6.93014	1048.68	6.93014	101.592	3
RR-14 <>	459.366	377496	33.866	13.4575	0.333442	1.8429	1.7665	0.179873	1.73474	0.982023	1066.28	17.0485	1060.9	11.6279	1049.86	6.73965	1049.86	6.73965	101.564	4
	473.547		33.6071													CA	1051.5±3.7
	27.9971		0.548845													WA	1045.2±7.3
Inherited Group (ca. 1170 Ma)
RR-15 <>	52.3009	2674.93	2.46709	12.7713	2.57088	2.03537	2.95843	0.188528	1.46385	0.494807	1113.4	14.9686	1127.41	20.1456	1154.5	51.0128	1154.5	51.0128	96.4398	1
RR-10 <>	269.329	10806.8	0.92085	12.6966	0.424976	2.07738	2.44718	0.191295	2.41	0.984806	1128.39	24.9472	1141.37	16.7753	1166.12	8.43786	1166.12	8.43786	96.7646	2
RR-9 <>	211.696	7266.1	0.792861	12.6932	0.727314	2.13791	2.60048	0.196816	2.4967	0.960092	1158.19	26.4679	1161.15	17.9919	1166.65	14.4267	1166.65	14.4267	99.2753	3
RR-8 <>	238.382	10380.5	0.817505	12.6664	0.600755	2.05787	2.5038	0.189047	2.43066	0.970789	1116.21	24.9124	1134.91	17.1108	1170.88	11.9116	1170.88	11.9116	95.3313	4
RR-4 <>	25.5927	1768.76	0.276339	12.6316	2.7012	2.01699	3.26495	0.184783	1.83396	0.561712	1093.05	18.4388	1121.25	22.1669	1176.32	53.4471	1176.32	53.4471	92.9211	5
RR-6 <>	151.778	6549.83	1.52114	12.6075	0.647351	2.13382	2.1966	0.195113	2.09904	0.955588	1149.01	22.0912	1159.83	15.1879	1180.1	12.7989	1180.1	12.7989	97.3658	6
RR-18 <>	43.9913	2627	2.31007	12.5629	3.08409	2.08203	4.03034	0.189704	2.59461	0.643771	1119.77	26.6705	1142.9	27.6522	1187.1	60.9275	1187.1	60.9275	94.3282	7
RR-17 <>	42.2121	2257.51	2.14559	12.5483	3.43882	2.0916	3.97423	0.190354	1.99224	0.501291	1123.29	20.5376	1146.05	27.3076	1189.4	67.9309	1189.4	67.9309	94.4425	8
RR-16 <>	42.2764	1946.97	1.99666	12.5457	2.20056	2.04336	3.8473	0.185925	3.15583	0.820271	1099.26	31.8945	1130.08	26.2346	1189.81	43.4685	1189.81	43.4685	92.3896	9
RR-7 <>	128.206	6623.44	1.31841	12.5453	1.03497	2.05266	2.35211	0.186765	2.11217	0.897988	1103.83	21.4279	1133.18	16.0606	1189.87	20.4466	1189.87	20.4466	92.769	10
	120.576		1.45665													UI	1163±20
	92.5927		0.750421													WA	1172±10
Inherited Group (ca. 1375 Ma)
RR-2 <>	115.342	70561.3	1.14745	11.4418	0.624569	2.88607	1.48679	0.239498	1.34924	0.907487	1384.09	16.806	1378.28	11.2122	1369.28	12.0212	1369.28	12.0212	101.081	1
RR-1 <>	79.8832	249342	1.02124	11.375	0.891171	2.8672	2.93807	0.236541	2.79966	0.952889	1368.69	34.5244	1373.34	22.1219	1380.55	17.1258	1380.55	17.1258	99.1406	2
	97.6128		1.08435													CA	1376±8.4
	25.0735		0.0892384													WA	1373±19

## Sheet: PlotDat27
Source sheet	SV	1.79649	0.176146	1.70839	0.169617	1.73524	0.171433	1.76235	0.173251	1.78974	0.175073	1.81739	0.176897	1.84532	0.178724	1.87353	0.180554	1.90202	0.182387	1.68	0.167982	1.68	0.167668	1.68	0.168296	1.67741	0.167804	1.85154	0.181499
Plot name	Concordia27	IsoLine	IsoLine	1.7082	0.169684	1.73505	0.171501	1.76216	0.17332	1.78954	0.175143	1.8172	0.176968	1.84512	0.178796	1.87333	0.180626	1.90181	0.18246	1.68	0.167982	1.68	0.167668	1.68	0.168296	1.70391	0.169617	1.85033	0.181483
Plot Type	1			1.70768	0.169747	1.73451	0.171564	1.76161	0.173384	1.78898	0.175207	1.81663	0.177033	1.84454	0.178861	1.87273	0.180693	1.90121	0.182527	1.6873	0.168482	1.6873	0.168168	1.6873	0.168797	1.73067	0.171433	1.84676	0.181233
1st free col	31			1.70684	0.169798	1.73366	0.171616	1.76075	0.173437	1.7881	0.17526	1.81572	0.177087	1.84362	0.178916	1.8718	0.180748	1.90025	0.182583	1.69462	0.168983	1.69462	0.168667	1.69462	0.169299	1.7577	0.173251	1.841	0.180761
Sigma Level	1			1.70577	0.169835	1.73257	0.171653	1.75963	0.173475	1.78696	0.175299	1.81456	0.177125	1.84244	0.178955	1.87059	0.180787	1.89902	0.182623	1.70196	0.169484	1.70196	0.169167	1.70196	0.169801	1.78499	0.175073	1.83329	0.180088
Absolute Errs	FALSE			1.70455	0.169854	1.73132	0.171673	1.75836	0.173494	1.78566	0.175318	1.81324	0.177145	1.84109	0.178975	1.86922	0.180808	1.89762	0.182643	1.70932	0.169985	1.70932	0.169668	1.70932	0.170303	1.81255	0.176897	1.82398	0.179242
Symbol Type	1			1.70327	0.169854	1.73002	0.171673	1.75703	0.173494	1.78431	0.175318	1.81186	0.177145	1.83969	0.178975	1.86778	0.180808	1.89616	0.182643	1.7167	0.170487	1.7167	0.170168	1.7167	0.170806	1.84039	0.178724	1.81346	0.178261
Inverse Plot	FALSE			1.70205	0.169835	1.72877	0.171653	1.75576	0.173475	1.78302	0.175299	1.81054	0.177125	1.83834	0.178955	1.86641	0.180787	1.89476	0.182623	1.7241	0.170989	1.7241	0.170669	1.7241	0.171308	1.8685	0.180554	1.8022	0.177187
Color Plot	TRUE			1.70098	0.169798	1.72768	0.171616	1.75465	0.173437	1.78188	0.17526	1.80938	0.177087	1.83716	0.178916	1.86521	0.180748	1.89353	0.182583	1.73153	0.17149	1.73153	0.17117	1.73153	0.171811	1.89689	0.182387	1.79069	0.176068
3D plot	FALSE			1.70014	0.169747	1.72683	0.171564	1.75378	0.173384	1.781	0.175207	1.80848	0.177033	1.83624	0.178861	1.86427	0.180693	1.89258	0.182527	1.73897	0.171993	1.73897	0.171671	1.73897	0.172314	IsoLine	IsoLine	1.77944	0.174952
Linear	FALSE			1.69961	0.169684	1.72629	0.171501	1.75323	0.17332	1.78043	0.175143	1.80791	0.176968	1.83565	0.178796	1.86367	0.180626	1.89197	0.18246	1.74643	0.172495	1.74643	0.172172	1.74643	0.172818			1.76893	0.173889
Data Range	G63:K63			1.69943	0.169617	1.7261	0.171433	1.75304	0.173251	1.78024	0.175073	1.80771	0.176897	1.83545	0.178724	1.86347	0.180554	1.89176	0.182387	1.75391	0.172997	1.75391	0.172674	1.75391	0.173321			1.75962	0.172924
Filled Symbols	FALSE			1.69961	0.169549	1.72629	0.171364	1.75323	0.173182	1.78043	0.175003	1.80791	0.176826	1.83565	0.178652	1.86367	0.180482	1.89197	0.182314	1.76141	0.1735	1.76141	0.173175	1.76141	0.173825			1.75193	0.1721
ConcAge	TRUE			1.70014	0.169487	1.72683	0.171301	1.75378	0.173119	1.781	0.174938	1.80848	0.176761	1.83624	0.178587	1.86427	0.180415	1.89258	0.182246	1.76893	0.174003	1.76893	0.173677	1.76893	0.174329			1.74618	0.171452
ConcSwap	FALSE			1.70098	0.169436	1.72768	0.171249	1.75465	0.173066	1.78188	0.174885	1.80938	0.176707	1.83716	0.178532	1.86521	0.18036	1.89353	0.182191	1.77648	0.174506	1.77648	0.174179	1.77648	0.174833			1.74264	0.17101
1st Symbol-row	1			1.70205	0.169399	1.72877	0.171212	1.75576	0.173028	1.78302	0.174847	1.81054	0.176669	1.83834	0.178493	1.86641	0.18032	1.89476	0.182151	1.78404	0.17501	1.78404	0.174682	1.78404	0.175338			1.74144	0.170792
				1.70327	0.169379	1.73002	0.171192	1.75703	0.173008	1.78431	0.174827	1.81186	0.176648	1.83969	0.178473	1.86778	0.1803	1.89616	0.18213	1.79163	0.175513	1.79163	0.175184	1.79163	0.175842			1.74266	0.170809
				1.70455	0.169379	1.73132	0.171192	1.75836	0.173008	1.78566	0.174827	1.81324	0.176648	1.84109	0.178473	1.86922	0.1803	1.89762	0.18213	1.79923	0.176017	1.79923	0.175687	1.79923	0.176347			1.74622	0.171058
				1.70577	0.169399	1.73257	0.171212	1.75963	0.173028	1.78696	0.174847	1.81456	0.176669	1.84244	0.178493	1.87059	0.18032	1.89902	0.182151	1.80686	0.176521	1.80686	0.17619	1.80686	0.176852			1.75199	0.17153
				1.70684	0.169436	1.73366	0.171249	1.76075	0.173066	1.7881	0.174885	1.81572	0.176707	1.84362	0.178532	1.8718	0.18036	1.90025	0.182191	1.8145	0.177025	1.8145	0.176693	1.8145	0.177357			1.75969	0.172203
				1.70768	0.169487	1.73451	0.171301	1.76161	0.173119	1.78898	0.174938	1.81663	0.176761	1.84454	0.178587	1.87273	0.180415	1.90121	0.182246	1.82217	0.17753	1.82217	0.177197	1.82217	0.177863			1.76901	0.173049
				1.7082	0.169549	1.73505	0.171364	1.76216	0.173182	1.78954	0.175003	1.8172	0.176826	1.84512	0.178652	1.87333	0.180482	1.90181	0.182314	1.82986	0.178035	1.82986	0.177701	1.82986	0.178369			1.77953	0.17403
				1.70839	0.169617	1.73524	0.171433	1.76235	0.173251	1.78974	0.175073	1.81739	0.176897	1.84532	0.178724	1.87353	0.180554	1.90202	0.182387	1.83757	0.178539	1.83757	0.178204	1.83757	0.178874			1.79079	0.175104
				ConcTikEll	ConcTikEll	ConcTikEll	ConcTikEll	ConcTikEll	ConcTikEll	ConcTikEll	ConcTikEll	ConcTikEll	ConcTikEll	ConcTikEll	ConcTikEll	ConcTikEll	ConcTikEll	ConcTikEll	ConcTikEll	1.8453	0.179045	1.8453	0.178709	1.8453	0.179381			1.80229	0.176223
																				1.85305	0.17955	1.85305	0.179213	1.85305	0.179887			1.81355	0.177339
																				1.86082	0.180055	1.86082	0.179717	1.86082	0.180394			1.82406	0.178402
																				1.86861	0.180561	1.86861	0.180222	1.86861	0.1809			1.83336	0.179367
																				1.87643	0.181067	1.87643	0.180727	1.87643	0.181407			1.84106	0.180192
																				1.88426	0.181573	1.88426	0.181232	1.88426	0.181915			1.8468	0.180839
																				1.89212	0.18208	1.89212	0.181738	1.89212	0.182422			1.85035	0.181281
																				1.9	0.182586	1.9	0.182243	1.9	0.18293			1.85154	0.181499
																				1.9	0.182586	1.9	0.182243	1.9	0.18293
																				IsoLine	IsoLine	ConcBand	ConcBand	ConcBand	ConcBand

[truncated: 3 more sheets: PlotDat28, SV, WP]
